1           **Evidence Accumulates for Individual Attributes during Value-Based Decisions**

2                                   Douglas G. Lee<sup>1</sup>                                   Todd A. Hare<sup>2,3</sup>

3           <sup>1</sup> Institute of Cognitive Sciences and Technologies, National Research Council of Italy

4           <sup>2</sup> Zurich Center for Neuroeconomics, Department of Economics, University of Zurich

5                                   <sup>3</sup> Neuroscience Center Zurich, University of Zurich and ETH Zurich

6

7

8

9

10

11

12   Email for correspondence:

13   DouglasGLee@gmail.com

14 **Abstract**

15 When choosing between different options, we tend to consider specific attribute qualities rather  
16 than deliberating over some general sense of the objects' overall values. The importance of each  
17 attribute together with its quality will determine our preference rankings over the available  
18 alternatives. Here, we show that the relative importance of the latent attributes within food rewards  
19 reliably differs when the items are evaluated in isolation compared to when binary choices are  
20 made between them. Specifically, we used standard regression and sequential sampling models to  
21 examine six datasets in which participants evaluated, and chose between, multi-attribute snack  
22 foods. We show that models that assume that attribute importance remains constant across  
23 evaluation and choice contexts fail to reproduce fundamental patterns in the choice data and  
24 provide quantitatively worse fits to the choice outcomes, response times, and confidence reports  
25 compared to models that allow for attribute importance to vary across preference elicitation  
26 methods. Our results provide important evidence that incorporating attribute-level information into  
27 computational models helps us to better understand the cognitive processes involved in value-  
28 based decision-making.

29

30 *Keywords:* multi-attribute choice, value-based choice, preferential choice, drift-diffusion model,

31 DDM

## 32 **Introduction**

33 Most decisions that we make are based on information about a variety of relevant features  
34 of the available options. Theories and mathematical models of multi-attribute choice generally  
35 agree that, in principle, the decision system in our brains should compare options based on how  
36 well they score across all relevant attribute dimensions (Bettman et al., 1998; Gigerenzer &  
37 Gaissmaier, 2011; E. J. Johnson & Payne, 1985; Keeney et al., 1993; Levav et al., 2010; Payne et  
38 al., 1988, 1993; Russo et al., 1996; Shah & Oppenheimer, 2008). These overall scores, be they  
39 based on subjective valuations or more objective features, are typically thought to be calculated as  
40 the weighted sums of sub-scores across all dimensions (Bettman et al., 1998; Bhatia & Stewart,  
41 2018; Gigerenzer & Gaissmaier, 2011; E. J. Johnson & Payne, 1985; Levav et al., 2010; Payne et  
42 al., 1988, 1993; Russo et al., 1996; Shah & Oppenheimer, 2008). Specifically, each option will be  
43 assigned a score along each attribute dimension, and each dimension will be given some weight  
44 according to how relevant or important it is to the decision. Simplifications of this strategy that  
45 assign equal weights to all attributes (Dawes, 1979; Dawes & Corrigan, 1974), reduce attribute  
46 scores to binary better/worse rankings (Russo & Doshier, 1983), or only consider a subset of the  
47 attributes have been proposed as well (Fishburn, 1974; Tversky, 1972). How well these simpler  
48 strategies perform depends the choice context (Bettman et al., 1998; Gigerenzer & Gaissmaier,  
49 2011; E. J. Johnson & Payne, 1985; Levav et al., 2010; Payne et al., 1988, 1993; Russo et al., 1996;  
50 Shah & Oppenheimer, 2008). Regardless of precisely how they are combined, almost every choice  
51 is determined by an assessment of multiple attributes. Thus, it is important for both basic and  
52 applied researchers to better understand how the attribute composition of choice options (and not  
53 just their overall values) influences the decision-making process in the brain.

54           It is known that individuals' preferences over options that combine monetary gains and  
55 losses with probabilities or time delays may reverse when different methods are used to elicit those  
56 preferences. For example, preferences revealed through choices have been shown to reverse  
57 compared to those elicited by matching, pricing, or rating procedures (Alós-Ferrer et al., 2016;  
58 Alos-Ferrer et al., 2020, 2021; Fischer et al., 1999; Grether & Plott, 1979; Lichtenstein & Slovic,  
59 1971; Seidl, 2002; Tversky et al., 1988, 1990; Weber & Johnson, 2009). A leading explanation for  
60 these preference reversals is that the weights on the risk, time, and/or money dimensions differ  
61 across the preference elicitation procedures (Seidl, 2002; Tversky et al., 1988). Eye-tracking  
62 experiments have shown that changes in the proportion of visual fixations to a lottery's potential  
63 monetary outcome relative to its probability across choice and pricing trials are associated with  
64 the differences in the relative weight given to outcomes versus probabilities when choosing versus  
65 setting a price (Alos-Ferrer et al., 2021). This influence of visual attention on context dependent  
66 weighting is consistent with sequential sampling models that predict that the effects of overall  
67 value and attribute differences on choices are determined in part by the amount of attention paid  
68 to each option or attribute (Busemeyer & Townsend, 1993; Diederich, 1997; Krajbich et al., 2010;  
69 Roe et al., 2001). Together these theories and data form the basis of our hypothesis that decision  
70 values in naturalistic multi-attribute choices will also be constructed at the time of choice from the  
71 options' basic attributes in a context-dependent manner, rather than being compared as a unitary  
72 overall value aggregated across all attributes in a constant fashion.

73           Consistent with this idea, recent work has shown that the disparity of the options' attribute  
74 compositions affects multi-attribute decision making (Lee & Holyoak, 2021). A pair of options  
75 has high disparity if, for example, one option scores high in the first attribute dimension but low  
76 in the second, while the other option scores high in the second dimension but low in the first

77 (Figure 1a, left panel). On the contrary, a pair of options has low disparity if both options have  
78 similar scores along each attribute dimension (Figure 1a, middle panel). Notably, two decisions  
79 could be equally difficult in the traditional sense that the overall value ratings of the choice options  
80 are equally close together, yet have very different levels of disparity (Figure 1a, right panel). In  
81 multiple independent experiments, Lee & Holyoak (Lee & Holyoak, 2021) found that choice  
82 behavior differs as a function of disparity, such that higher disparity corresponds to higher choice  
83 consistency (i.e., a choice in favor of the option that was previously rated as having the higher  
84 overall value) and lower response time, even after accounting for differences in overall values.  
85 Here, we show that computational models of value comparison that assume an immutable  
86 combination of attributes into the overall option value cannot account for this pattern of results.

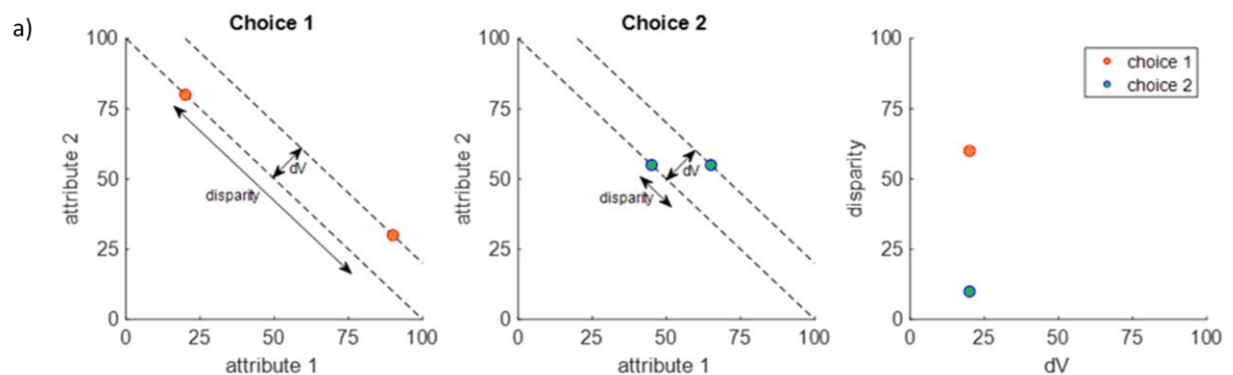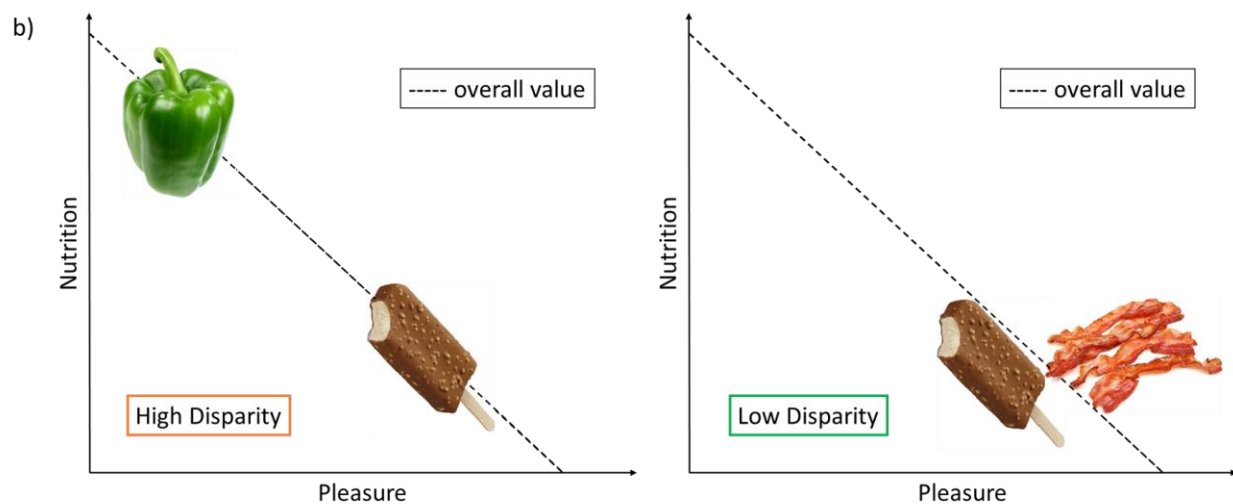

88 **Figure 1. Choice disparity.** **a)** A schematic illustration of orthogonal components of choice  
89 difficulty:  $dV$  and disparity. *The left plot illustrates a “high disparity” choice, and the middle plot*  
90 *illustrates a “low disparity” choice. The orange and green dots represent the alternative options*  
91 *for each choice, each plotted according to its measurements on two attribute dimensions. The*  
92 *example assumes equal importance weights for each attribute, so the iso-value curves are*  
93 *represented by parallel lines with slope -1. The difference in overall value of the options,  $dV$ , is*  
94 *the distance between the iso-value curves on which the options lie. Disparity is the distance*  
95 *between the options in the dimension orthogonal to overall value (see Equation 1 below for a*  
96 *mathematical formulation). The right plot shows the location of each choice pair in the*  
97 *transformed  $dV$ -disparity space. **b)** An example illustration of two choice sets for snack foods, one*  
98 *high disparity (left plot), one low disparity (right plot). As shown by the dashed iso-value lines, all*  
99 *of the available snacks are of comparable overall value (and thus each choice pair is of*  
100 *comparable low  $dV$ ). However, the two choice pairs are of very different disparity. In the high*  
101 *disparity pair (left), one option scores high on pleasure but low on nutrition, while the other option*  
102 *scores low on pleasure but high on nutrition. In the low disparity pair (right), both options score*  
103 *high on pleasure and low on nutrition.*  
104

105         Instead, choices between naturalistic multi-attribute stimuli and subsequent confidence  
106 ratings for those choices are best explained by models in which individual attributes are actively  
107 (re)weighted during the comparison process. In our tests, we focus on multi-attribute choices  
108 between naturalistic, unitary options with multiple inherent, latent features as opposed to bundled  
109 or conjoint options made up of multiple components (e.g., probability + amount for risky choice;  
110 delay + amount for inter-temporal choice; effort or pain + reward for cost-benefit tradeoffs;  
111 different items for bundled choices). We believe that this type of naturalistic reward, which could  
112 plausibly be treated as an integrated whole, provides a stronger test of whether items are compared  
113 based on fixed overall values or values constructed from flexible attribute weights during  
114 decisions. We find that models that allow context-dependent attribute weights during decisions  
115 best explain the outcome and response time data. However, we also show that using a subset of  
116 attribute-specific ratings together with overall value ratings helps to better explain choice behavior  
117 (when obtaining ratings for the full set of individual attributes is impractical).

118

119 **Methods**

120 *Data*

121 We analyzed the data from six previously published experiments (Experiments 1-5 in (Lee  
122 & Holyoak, 2021), plus one unpublished pilot experiment that we label Experiment 0). The total  
123 number of participants across the six datasets was 307, using the same exclusion criteria from the  
124 original study (41 for Experiment 0, 50 for experiment 1, 48 for experiment 2, 54 for experiment  
125 3, 60 for experiment 4, and 54 for experiment 5).

126 In each experiment, participants completed several distinct phases. They first passively  
127 observed images of individual snack foods (100 in Experiments 0 and 1, 60 in Experiments 2-5).  
128 Second, they provided overall value ratings for each individual snack food. Next, they rated the  
129 pleasure they expected to derive from each food and its nutritional value, in separate experimental  
130 sections (the order of the pleasure and nutrition rating tasks was counterbalanced across  
131 participants). Following all three rating phases, participants completed a choice task in which they  
132 chose their preferred snack from pairs of options (50 choice trials for Experiments 0 and 1, 30  
133 choice trials for Experiments 2-5). During the choice section, after each choice, participants also  
134 rated their confidence that the option they chose was indeed their preferred option on that trial.

135 In addition to the aforementioned datasets, we also examined data from an unpublished  
136 pilot auxiliary task that were originally collected along with the primary data reported in (Lee &  
137 Daunizeau, 2021). In the main study, participants provided overall value ratings for 148 food  
138 options, then made 74 choices between pairs of options. Out of the main group of participants, 17  
139 completed the auxiliary task, in which they rated each of the food options in terms of “taste”,  
140 “health”, “texture”, and “appearance”. We are thus able to compare versions of our models

141 (described below) that incorporate four attributes rather than two (the third and fourth attributes  
142 enter the models in the same way as the first and second attributes).

143

#### 144 *Models*

145 In this study, we consider several variants of the drift-diffusion model (DDM; (Ratcliff,  
146 1978; Ratcliff & McKoon, 2008; Ratcliff & Rouder, 1998)). The specifics of each model are  
147 detailed below. The DDM is a member of the evidence accumulation-to-bound class of models,  
148 wherein the values of the options (in simple two-alternative forced-choice tasks) are repeatedly  
149 compared across time. The so-called evidence that arises in favor of one option over the other is  
150 corrupted by processing (e.g., neural) noise, so repeated samples are accumulated to cancel out the  
151 noise. Once a sufficient amount of evidence has been accrued (i.e., the response threshold is  
152 reached), the process terminates and a choice is made. We fit variants of the DDM in which the  
153 evidence accumulation rate is proportional to the difference in overall value between the options  
154 (ovDDM) or to a weighted linear combination of the differences in individual attributes (maDDM)  
155 to six different empirical data sets. We demonstrate that the maDDM provides a better account of  
156 choice probabilities, mean response times (RTs), and the effects of attribute disparity on choice  
157 outcomes and RT, in terms of both the qualitative predictions and quantitative fits of the models.

158

#### 159 *Model 1: Overall value DDM (ovDDM)*

160 The first model is a DDM in which only the aggregated, overall values of the two options  
161 influence the evidence accumulation or drift rate on each trial. Specifically, evidence about the  
162 overall value of each option is sampled at each time step, the evidence for the two options is



163 compared, and the relative evidence in favor of option 1 over option 2 is added to the evidence  
164 accumulator. The cumulative evidence ( $x$ ) evolves across deliberation time as follows:

$$165 \quad x_t = x_{t-1} + \mu_1 - \mu_2 + \varepsilon$$

$$166 \quad \varepsilon \sim N(0, \sigma^2)$$

$$167 \quad x_0 = 0$$

168 where  $\mu_i$  is the reported overall value of option  $i \in \{1, 2\}$  and  $\sigma^2$  is white noise in the accumulation  
169 process. Evidence sampling and accumulation proceeds until  $x$  reaches a response boundary  $\in \{\theta,$   
170  $-\theta\}$ , with the sign determining the chosen option (arbitrarily defined as positive for option 1,  
171 negative for option 2). Response time (RT) is equal to  $t$  at the moment a boundary is crossed.  
172 Choice probability ( $p$ , choice of option 1) and mean RT can be analytically derived (Alós-Ferrer,  
173 2018) as a function of  $\mu_1$ ,  $\mu_2$ , and  $\sigma^2$ , with  $\theta$  being fixed (here, to  $\theta = 1$  for simplicity):

$$174 \quad DV = \mu_1 - \mu_2$$

$$175 \quad p = \frac{1}{1 + e^{\left(\frac{-2dDV}{\sigma^2}\right)}}$$

$$176 \quad RT = \frac{2p - 1}{dDV}$$

177 where  $\mu_1$  and  $\mu_2$  are independent variables, and  $d$  and  $\sigma^2$  are free parameters to be estimated to  
178 capture the individual-specific mean rate of evidence accumulation (drift rate) and level of noise  
179 in the accumulation process, respectively.

180

### 181 *Model 2: Multi-attribute DDM (maDDM)*

182 The second model is of the same form as Model 1, except that the evidence accumulator is  
183 driven by two separate evidence streams (one for each attribute dimension: a, b). The process is  
184 otherwise identical, and it unfolds as follows:

185 
$$x_t = x_{t-1} + \mu_1^a - \mu_2^a + \mu_1^b - \mu_2^b + \varepsilon$$

186 
$$\varepsilon \sim N(0, \sigma^2)$$

187 
$$x_0 = 0$$

188 where  $\mu_i^j$  is the reported value of option  $i \in \{1,2\}$  along attribute dimension  $j \in \{a,b\}$ , and  $\sigma^2$  is  
189 white noise common to the overall evidence accumulation process. Choice probability and mean  
190 RT are derived as:

191 
$$DV^a = \mu_1^a - \mu_2^a$$

192 
$$DV^b = \mu_1^b - \mu_2^b$$

193 
$$p = \frac{1}{1 + e^{\left[ \frac{-2(d^a DV^a + d^b DV^b)}{\sigma^2} \right]}}$$

194 
$$RT = \frac{2p - 1}{d^a DV^a + d^b DV^b}$$

195 where  $d^j$  are independent free parameters that allow for different rates of evidence accumulation  
196 within each attribute dimension  $j \in \{a,b\}$ .

197

198 *Model 3: Multi-attribute DDM plus overall value (maDDM+)*

199 Our third model assumes that the drift rate is driven by the separate values of the individual  
200 attributes that were explicitly evaluated (in these experiments, pleasure and nutrition), but that it  
201 is also influenced by other attributes that were not explicitly evaluated. Thus, if the overall value  
202 ratings contain information about the attributes that were rated individually as well as other  
203 attributes that were not rated, including overall value should enhance the model fit. Therefore, in  
204 this model, the evidence accumulator is driven by evidence streams for each explicit attribute  
205 dimension as well as the aggregate overall value estimates. The process is otherwise identical to  
206 that in Models 1 and 2, and it unfolds as follows:

207 
$$x_t = x_{t-1} + \mu_1^o - \mu_2^o + \mu_1^a - \mu_2^a + \mu_1^b - \mu_2^b + \varepsilon$$

208 
$$\varepsilon \sim N(0, \sigma^2)$$

209 
$$x_0 = 0$$

210 where  $\mu_i^o$  is the reported overall value for option  $i \in \{1, 2\}$ ,  $\mu_i^j$  is the reported value of option  $i \in$   
211  $\{1,2\}$  along attribute dimension  $j \in \{a,b\}$ , and  $\sigma^2$  is white noise common to the overall evidence  
212 accumulation process. (Note that in cases where the individual attributes are highly correlated  
213 and/or the attribute ratings jointly explain a large portion of the variance in overall values, it may  
214 be necessary to employ orthogonalization or dimensionality reduction techniques, if the goal is to  
215 make inferences about the relative weights or importance of attributes in determining the drift  
216 rate.) Choice probability and mean RT are derived as:

217 
$$DV^o = \mu_1^o - \mu_2^o$$

218 
$$DV^a = \mu_1^a - \mu_2^a$$

219 
$$DV^b = \mu_1^b - \mu_2^b$$

220 
$$p = \frac{1}{1 + e^{\left[ \frac{-2(d^o DV^o + d^a DV^a + d^b DV^b)}{\sigma^2} \right]}}$$

221 
$$RT = \frac{2p - 1}{d^o DV^o + d^a DV^a + d^b DV^b}$$

222 where  $d^j$  are independent free parameters that allow for different rates of evidence accumulation  
223 for overall value estimates and within each attribute dimension  $j \in \{a,b\}$ .

224

225 ***Drift diffusion model fitting procedure***

226 We fit each of the three candidate models to the experimental data from each of our models  
227 under consideration. We then performed Bayesian model comparison to determine which of the  
228 models (if any) performed better than the others across the population of participants. For this

229 model fitting and comparison exercise, we relied on the Variational Bayesian Analysis toolbox  
230 (VBA, available freely at <https://mbb-team.github.io/VBA-toolbox/>; (Daunizeau et al., 2014)) with  
231 Matlab R2020a. Within participant and across trials, we entered the experimental variables  
232 {ratings of overall, pleasure, and nutrition for each option} as input and {choice = 1 for left option,  
233 0 for right option; RT} as output. We also provided the model-specific mappings from input to  
234 output as outlined in the analytical formulas above. As we fixed the threshold parameter  $\theta$  to 1, the  
235 parameters to be fitted were thus the drift rate  $d$  and diffusion noise  $\sigma^2$  terms described above in  
236 the model formulations. VBA requires prior estimates for the free parameters, for which we set  
237 the mean equal to 0 and the variance equal to  $e$  (to allow an arbitrarily large step size during the  
238 gradient descent search algorithm, yet constrain the algorithm to a reasonable search space) for  
239 each parameter. The theoretical drift rate and noise parameters are always positive; we thus  
240 constrained the search space of our model fitting algorithm to the positive domain. VBA then  
241 recovers an approximation to both the posterior density on unknown variables and the model  
242 evidence (which is used for model comparison). We used the VBA\_NLStateSpaceModel function  
243 to fit the data for each participant individually, followed by the VBA\_groupBMC function to  
244 compare the results of the model fitting across models for the full group of participants.

245         One benefit of using VBA to fit the data to our models is that it is computationally efficient,  
246 as it relies on Variational Bayesian analysis under the Laplace approximation. This iterative  
247 algorithm provides a free-energy approximation for the model evidence, which represents a natural  
248 trade-off between model accuracy (goodness of fit, or log likelihood) and complexity (degrees of  
249 freedom, or KL divergence between priors and fitted parameter estimates; see (Friston et al., 2007;  
250 Penny, 2012)). Additionally, the algorithm provides an estimate of the posterior density over the  
251 model's free parameters, starting with Gaussian priors. Individual log model evidence scores are

252 then provided as input to the group-level random-effect Bayesian model selection (BMS)  
253 procedure. BMS provides an exceedance probability that measures how likely it is that a given  
254 model is more frequently implemented, relative to all other models under consideration, in the  
255 population from which participants were drawn (Rigoux et al., 2014; Stephan et al., 2009). This  
256 approach to fitting and comparing variants of DDM has already been successfully demonstrated  
257 in previous studies (Feltgen & Daunizeau, 2021; Lee & Usher, 2021; Lopez-Persem et al., 2016).  
258

### 259 *Logistic regression for changes in attribute weights*

260 We fit Bayesian hierarchical regressions to the binary choice outcomes and the implied  
261 choice outcomes from the overall value rating sessions using the R package, brms, which relies on  
262 STAN for Markov Chain Monte Carlo sampling of the posterior distributions (Bürkner, 2017a,  
263 2017b; R Core Team, 2020; Stan Development Team, 2021). Both regressions included varying  
264 intercepts and slopes for each participant, however we omit these terms in the notation below for  
265 conciseness and clarity.

$$266 \text{ choice} \sim \beta_0 + \beta_1 * P_{dif} + \beta_2 * N_{dif} + \sigma$$

267 Here, choice indicates whether the participant selected the left item in the binary choice  
268 task or if the left item was rated higher in the overall value rating session. The differences in  
269 pleasure ( $P_{dif}$ ) and nutrition ( $N_{dif}$ ) ratings are computed as the rating for the left option minus the  
270 rating for the right option for the respective attributes. We used Gaussian priors with mean = 0 and  
271 SD = 1 for  $\beta_0 : \beta_3$  and half Cauchy priors with location = 0 and scale = 5 for the standard  
272 deviations of all participant-specific varying effects. We estimated the posterior distributions for  
273 all parameters based on 2500 samples from 4 independent chains after 2500 warm-up samples.

274

275 ***Linear regressions for confidence ratings***

276 We fit linear regressions to the choice confidence ratings, assuming that those ratings were  
277 right-censored given the high proportion of trials in which participants reported maximum  
278 confidence. In other words, we assumed that the true underlying confidence could extend beyond  
279 the upper limit of the confidence scale. We fit three right-censored linear regressions as Bayesian  
280 hierarchical models using the R package, brms, which relies on STAN for Markov Chain Monte  
281 Carlo sampling of the posterior distributions (Bürkner, 2017a, 2017b; R Core Team, 2020; Stan  
282 Development Team, 2021). All three regressions included varying intercepts and slopes for each  
283 participant, however we omit these terms in the notation below for conciseness and clarity.

284 
$$(LR1) \quad confidence \sim \beta_0 + \beta_1 * OV_{dif} + \sigma$$

285 
$$(LR2) \quad confidence \sim \beta_0 + \beta_1 * P_{dif} + \beta_2 * N_{dif} + \sigma$$

286 
$$(LR3) \quad confidence \sim \beta_0 + \beta_1 * P_{dif} + \beta_2 * N_{dif} + \beta_3 * OV_{dif} + \sigma$$

287 In all regressions, the differences in overall value ( $OV_{dif}$ ), pleasure ratings ( $P_{dif}$ ), or  
288 nutrition ratings ( $N_{dif}$ ) were computed as the absolute value of the difference between ratings for  
289 the option displayed on the left and right sides of the screen. We used Gaussian priors with mean  
290 = 0 and SD = 1 for  $\beta_0 : \beta_3$  and half Cauchy priors with location = 0 and scale = 5 for the standard  
291 deviations of all participant-specific varying effects. We estimated the posterior distributions for  
292 all parameters based on 2000 samples from 3 independent chains after 2000 warm-up samples.

293

294

**Results**

295 Lee and Holyoak (Lee & Holyoak, 2021) introduced the term *disparity* as a secondary  
296 characteristic of a decision, orthogonal to the primary characteristic most often used in the field:

297 overall value difference. The disparity between two options  $\{i,j\}$  with respect to two attribute  
298 dimensions (here, P for pleasure and N for nutrition) is calculated as:

$$299 \quad \text{disparity}_{i,j} \triangleq \left| \frac{[P_i \ N_i]^* \begin{bmatrix} -b_P \\ b_N \end{bmatrix} - [P_j \ N_j]^* \begin{bmatrix} -b_P \\ b_N \end{bmatrix}}{\| \begin{bmatrix} -b_P \\ b_N \end{bmatrix} \|} \right|, \text{ for options } i, j. \quad (1)$$

300 where  $b_P$  and  $b_N$  are the importance weights for the P and N attributes, respectively. Note that it  
301 would be straightforward to extend this formula to incorporate more than two options or more than  
302 two attributes. Disparity calculated in this way effectively transforms the variable space from  
303 attribute dimensions to decision dimensions (see Figure 1).

304

### 305 *Qualitative Model Predictions*

306 We first show the qualitative predictions that each model (simulated under its participant-  
307 specific best fitting parameters) makes with respect to the effects of value difference (dV) and  
308 disparity (D) on choice consistency, RT, and how this compares to the empirical data (Figure 2).  
309 For the synthetic data, we used the real input data for each individual participant (value of option  
310 1, or v1; value of option 2, or v2; pleasure of option 1, or p1; pleasure of option 2, or p2; nutrition  
311 of option 1, or n1; nutrition of option 2, or n2). The output data we used (choice probability and  
312 RT) was the output from the VBA model fitting procedure (described in the Methods section),  
313 where these variables were predicted using the best fitting parameter estimates for each participant  
314 under each model. Next, we performed mixed model regressions of choice (binomial) and of RT  
315 (linear) on dV and D, pooling all simulations together and including study and participant as  
316 random effect regressors. (Note: we coded the data such that option 1 always had the higher overall  
317 value.) Model 3 is the only model from the set we examined that is able to account for the  
318 qualitative benchmarks with respect to the positive impact of dV and D on choice consistency  
319 (whether or not the higher-rated option was chosen) and the negative impact of dV and D on RT

320 (see Figure 2). Model 1 accounts for the dV relationships, but obviously cannot account for any  
321 relationship involving D (as this model contains no information about the attribute composition of  
322 the options). Model 2 does account for all of the qualitative benchmarks, but it overemphasizes  
323 the impact of D (relative to dV) on both consistency and RT (in comparison to the empirical data).  
324 It thus seemed probable that Model 3 would perform best in a formal model comparison of these  
325 three models.



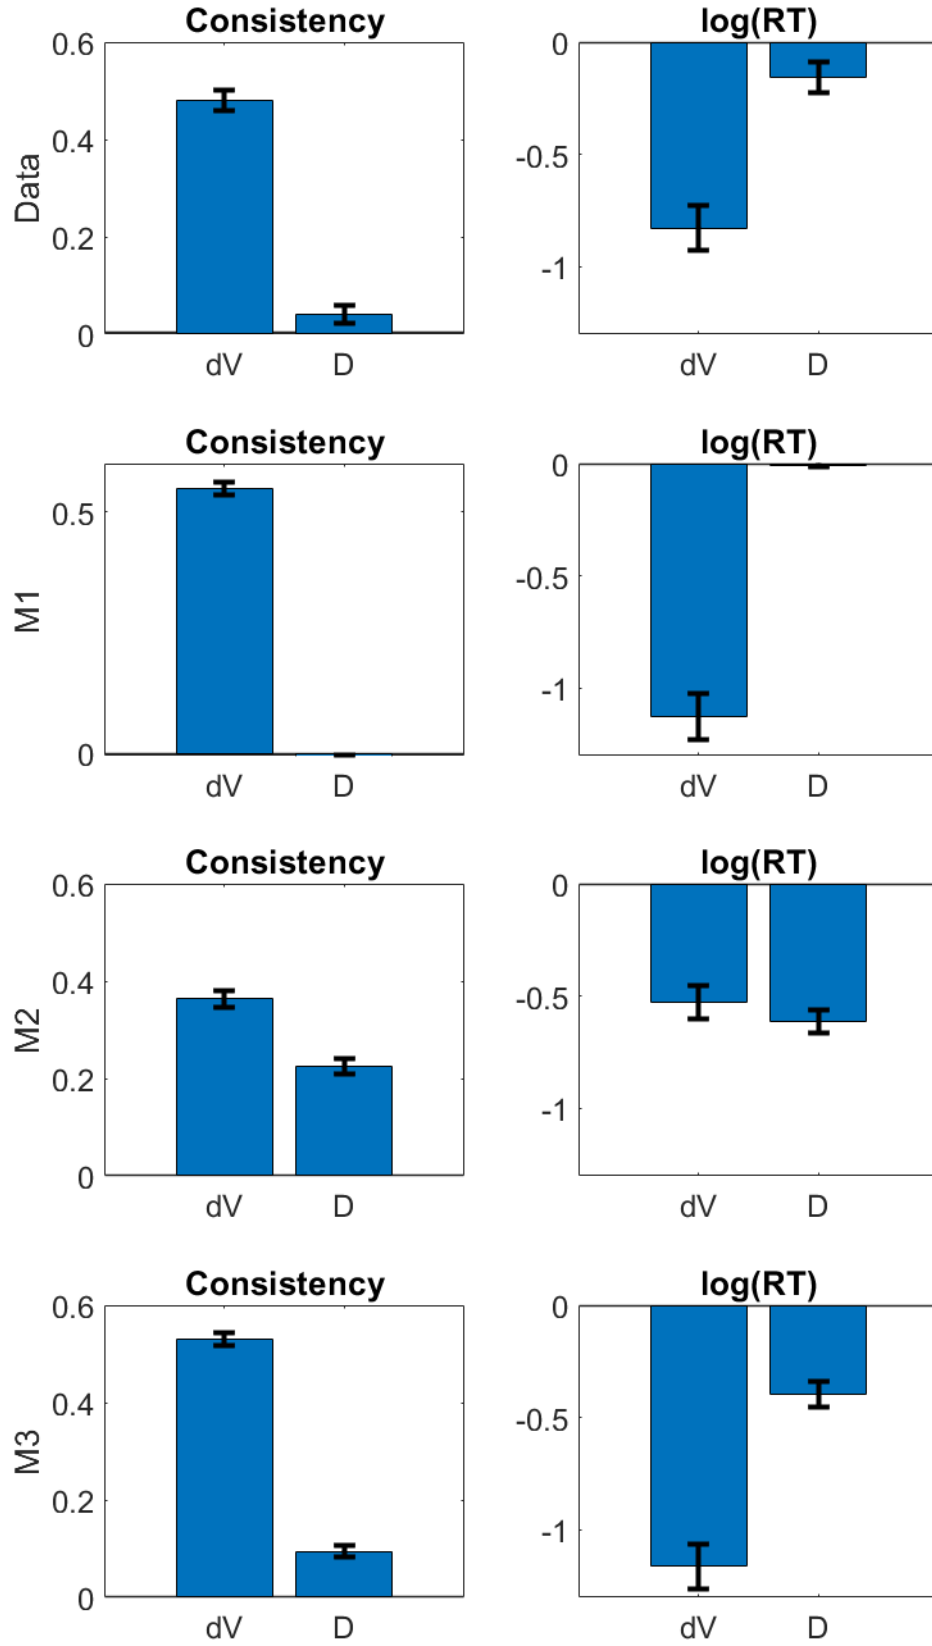

327 **Figure 2:** *Qualitative predictions of the effects of value difference ( $dV = \text{value of option 1} - \text{value}$*   
328 *of option 2) and disparity ( $D$ ; see equation 1) on choice consistency and  $\log(RT)$  in the empirical*  
329 *(top row) and simulated data (rows 2-4; shown for responses simulated using the best fitting*  
330 *parameters for each model; bar heights represent mean mixed model regression coefficients*  
331 *across participants; error bars represent s.e.m.).*  
332

### 333 *Quantitative model comparisons*

334 To evaluate the models, we computed specific pairwise model comparisons as well as a  
335 simultaneous comparison of all three diffusion decision model specifications. First, we compared  
336 the fit of the model based on overall value (Model 1) to a model based on individual attribute  
337 values (Model 2), to test our hypothesis that decision makers place different importance or decision  
338 weights on attributes during choices than when rating the overall value of each option in isolation.  
339 If the attributes are weighted and aggregated the same way during ratings and choices, then Model  
340 1, which uses the comprehensive overall value of the foods to estimate choices should outperform  
341 Model 2, which only uses a subset of the foods' attributes (pleasure and nutrition) to estimate  
342 choice outcomes and response times. If instead attributes are weighted differently during choices  
343 compared to ratings, then the flexibility to estimate attribute-specific decision weights may give  
344 Model 2 the advantage even though it is based on only two attributes out of a larger set. Across all  
345 six datasets (studies 0-5 from (Lee & Holyoak, 2021)), the participant population was split evenly  
346 between supporting Models 1 and 2 (estimated model frequency of 0.50 for each; see Figure 3A).

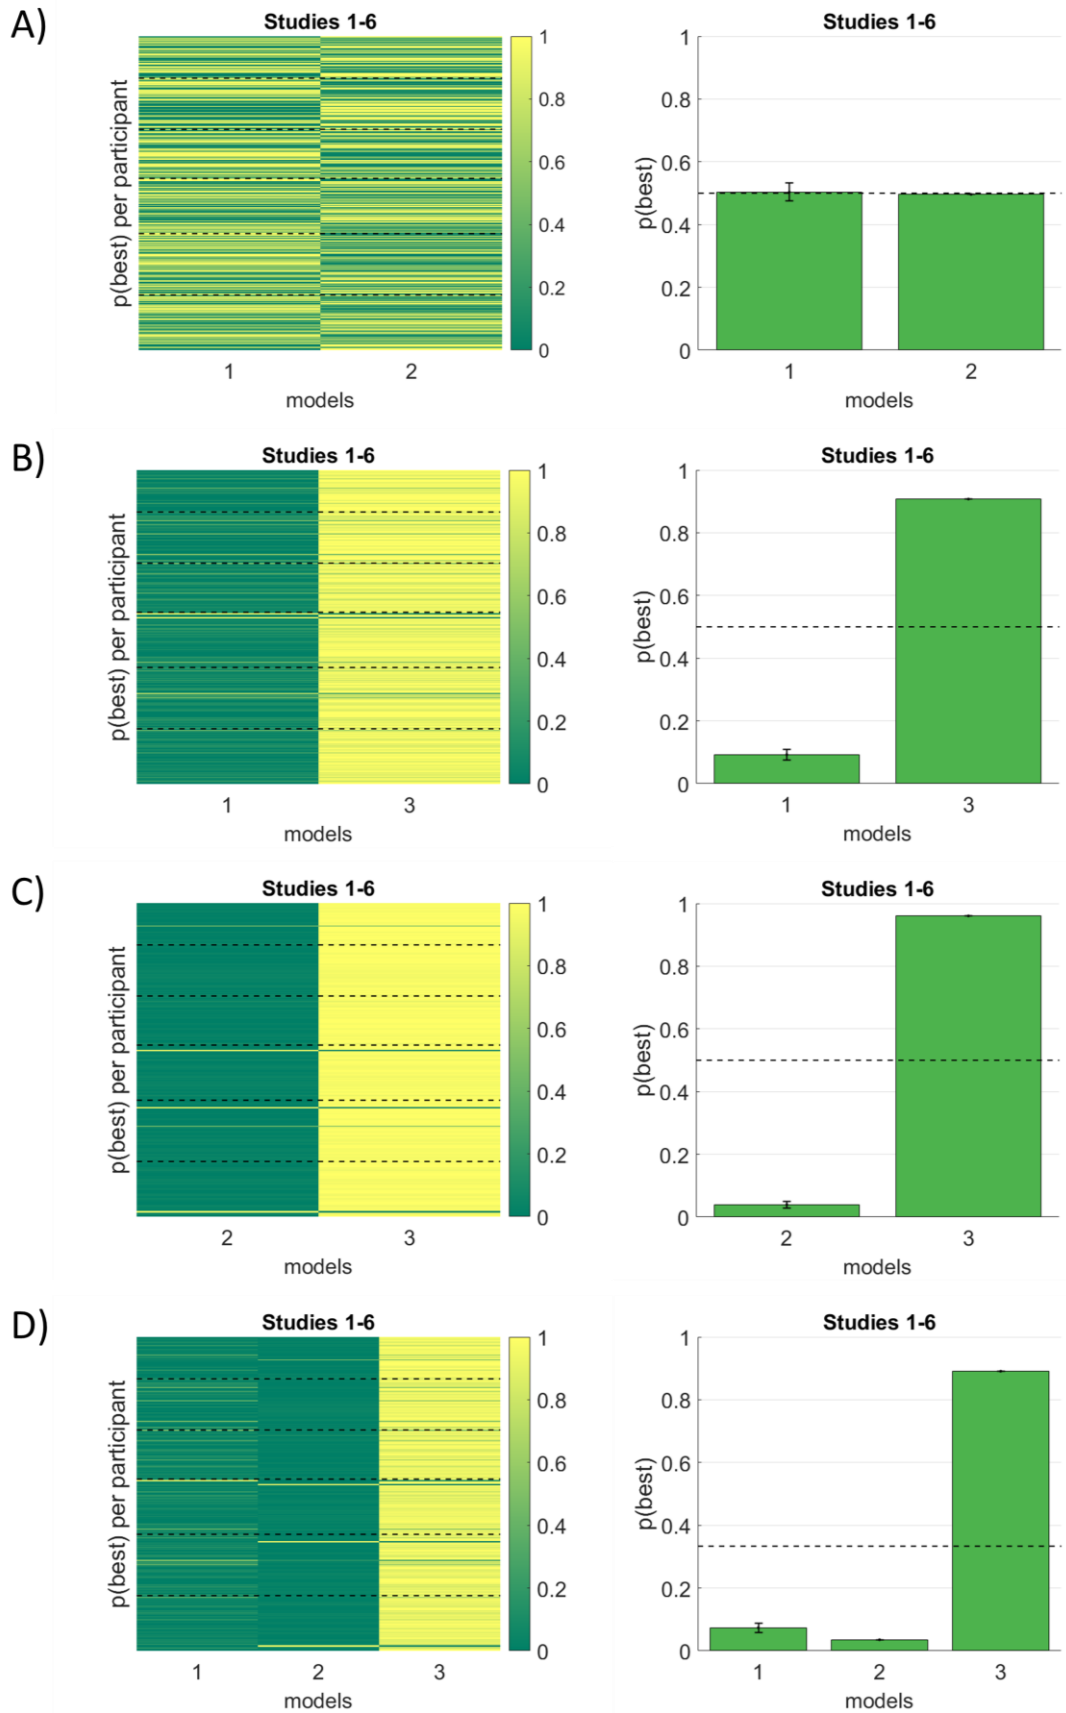

348 **Figure 3:** *Pairwise model comparison results: A) ovDDM (model 1) versus maDDM (model 2).*  
349 *B) ovDDM (model 1) versus maDDM+ (model 3). C) maDDM (model 2) versus maDDM+ (model*  
350 *3). D) Simultaneous comparison of ovDDM (model 1), maDDM (model 2), and maDDM+ (model*  
351 *3). We show here the probability that each model best accounted for the data at the participant*  
352 *level (left panel), across the six studies we examined; each cell represents the probability that the*  
353 *model (column) best represents the behavior of the participant (row). The black dashed lines serve*  
354 *to indicate which participants belonged to each of the six datasets. We also show the probability*  
355 *that each model best explains the data across the participant population (right panel), across all*  
356 *studies. Here, the black dashed line indicates chance level if all models were equally probable a*  
357 *priori.*  
358

359         Next, we tested a model in which we tried to combine the advantages of the comprehensive  
360 overall value ratings together with the flexibility to estimate choice-specific weights for a subset  
361 of the individual attributes. We fit a third DDM model (Model 3) that used the pleasure and  
362 nutrition ratings as well as information about the foods' values beyond those two attributes, in the  
363 form of the reported overall value. This provides a measure to quantify the benefit of including  
364 individual attribute ratings in the model in addition to overall value ratings. Model 3 performed  
365 much better than Model 1. Across all six datasets, Model 3 had an exceedance probability of 1 and  
366 an estimated model frequency of 0.91 (see Figure 3B).

367         We also tested Model 3 against Model 2, to quantify the benefit of including overall value  
368 ratings in the model in addition to individual attribute ratings (pleasure and nutrition). Model 3  
369 performed much better than Model 2. Across all six datasets, Model 3 had an exceedance  
370 probability of 1 and an estimated model frequency of 0.96 (see Figure 3C).

371         When we formally compared all three models simultaneously, the results were consistent  
372 with the pairwise comparisons reported in the preceding paragraphs. Across all datasets, the  
373 winning model was Model 3, with an exceedance probability of 1 and an estimated model  
374 frequency of 0.89. Model 1 had an estimated frequency of 0.07, and Model 2 had an estimated  
375 frequency of 0.04 (see Figure 3D).

376           The last model comparison analysis that we performed examined the dataset for which we  
377 had overall value ratings as well as four individual attribute ratings (taste, health, texture,  
378 appearance). Here, the model in which the attributes each individually contributed (Model 2)  
379 outperformed the standard DDM based on overall value ratings alone (Model 1; but note the small  
380 sample size,  $n=17$ ). In the other model comparisons, the results were the same as with our main  
381 datasets. Even though this additional dataset had attribute ratings covering a larger range of  
382 potentially relevant attributes (4 versus 2), Model 3 still dominated the model comparison  
383 (exceedance probability = 1; estimated model frequency for Model 3 = 0.96, for Models 1 and 2 =  
384 0.02 each; see Figure 4).

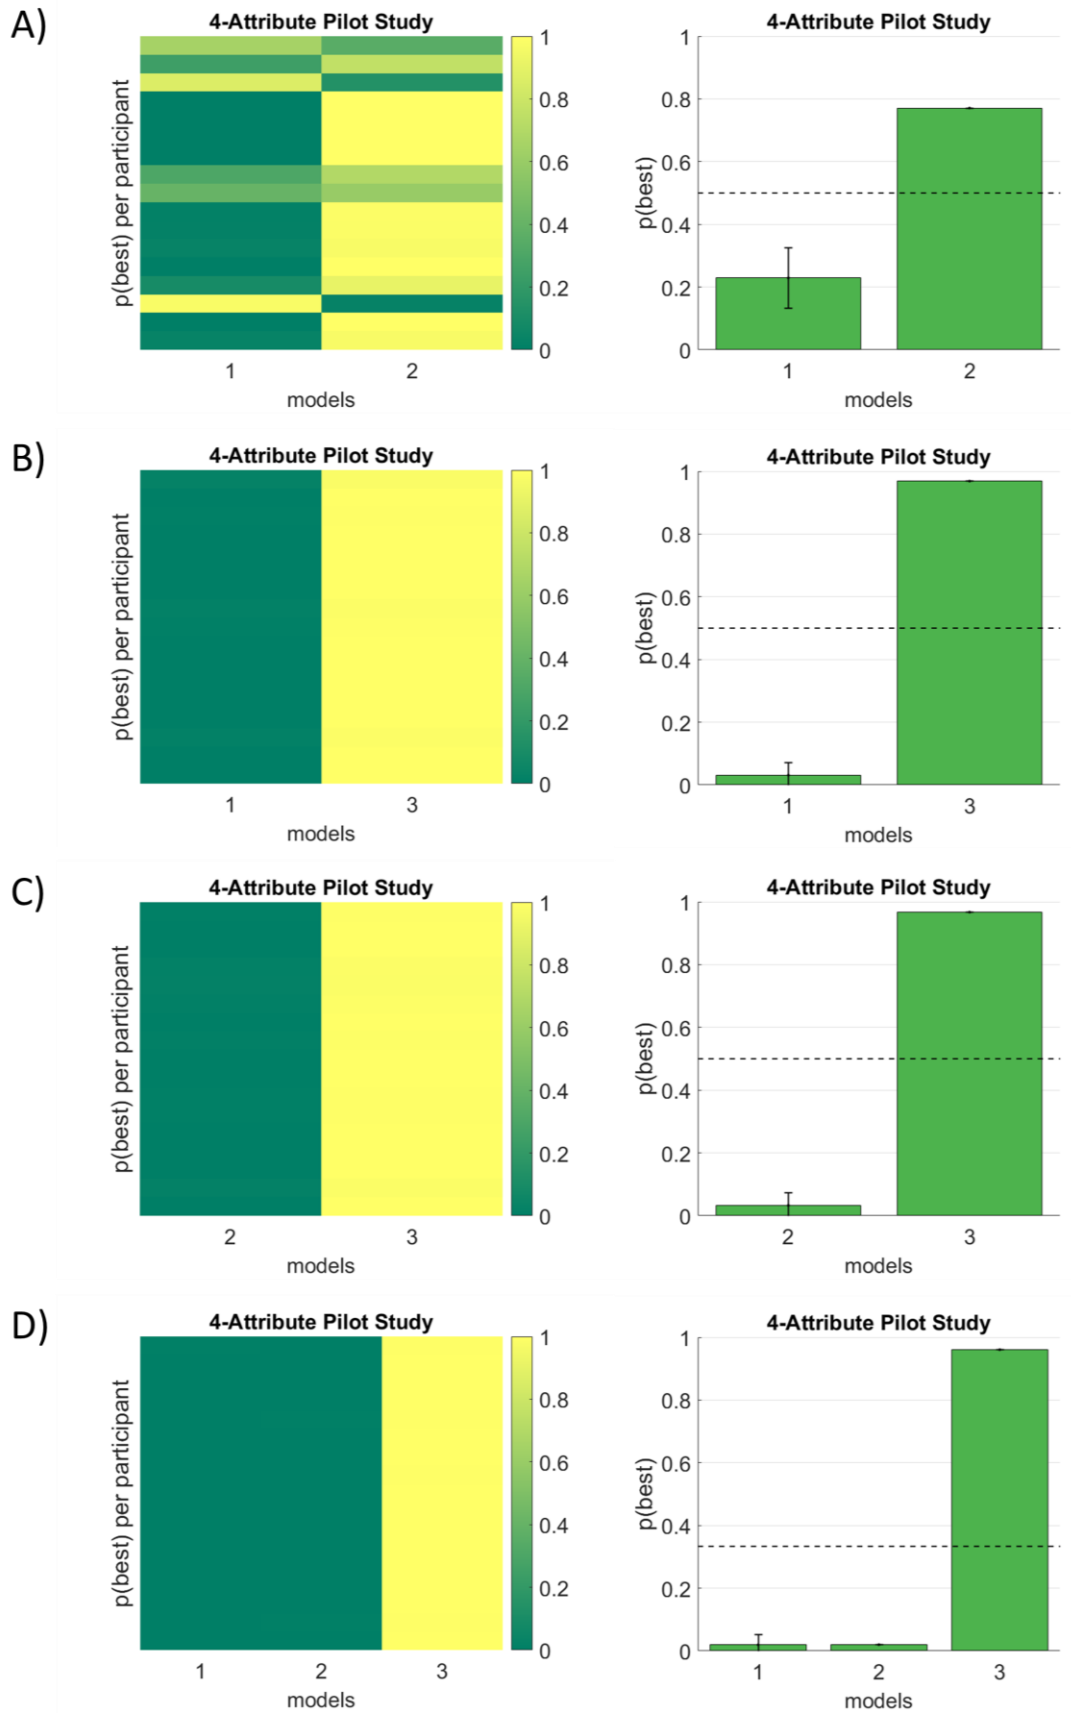

386 **Figure 4:** *Model comparison results for four-attribute choice data: A) ovDDM (model 1) versus*  
387 *maDDM (model 2). B) ovDDM (model 1) versus maDDM+ (model 3). C) maDDM (model 2)*  
388 *versus maDDM+ (model 3). D) Simultaneous comparison of ovDDM (model 1), maDDM (model*  
389 *2), and maDDM+ (model 3). We show here the probability that each model best accounted for the*  
390 *data at the participant level (left panel), across the six studies we examined; each cell represents*  
391 *the probability that the model (column) best represents the behavior of the participant (row). We*  
392 *also show the probability that each model best explains the data across the participant population*  
393 *(right panel), across all studies. The black dashed line indicates chance level if all models were*  
394 *equally probable a priori.*  
395

### 396 ***Model recoverability***

397 To verify that our model-fitting procedure is suitable for this specific analysis, we  
398 performed a test of model recoverability. Specifically, we took as the model input the actual data  
399 for each participant in Studies 1-6 (ratings of overall value, pleasure, and nutrition for each option).  
400 We then simulated the set of choice probabilities and mean RTs for each participant, separately  
401 according to each of our models, using the actual participant-specific fitted parameters for each  
402 model. Finally, we fit all simulated data (per simulated participant) to each of our models and  
403 performed the same formal model comparison as with our real experimental data. The results of  
404 this procedure can be seen in Figure 5 as a model confusion matrix. This matrix shows, for each  
405 true generative model, the percentage of simulated participants (under that model) that were  
406 attributed to each of the best fit models by our model-fitting procedure. As shown in the matrix,  
407 model confusion was low and the procedure attributed the true model as the best fitting model for  
408 the vast majority of the simulated participants (recovery accuracy: 87% for Model 1, 66% for  
409 Model 2, 69% for Model 3). There was a non-trivial amount of confusion between Model 3 and  
410 Models 1 and 2, which is expected because Model 3 is essentially a combination of Models 1 and  
411 2. Nevertheless, this confusion seems to have hurt Model 3 as much as it helped (i.e., the matrix is  
412 relatively symmetrical), so the results of our quantitative model comparison should be valid.

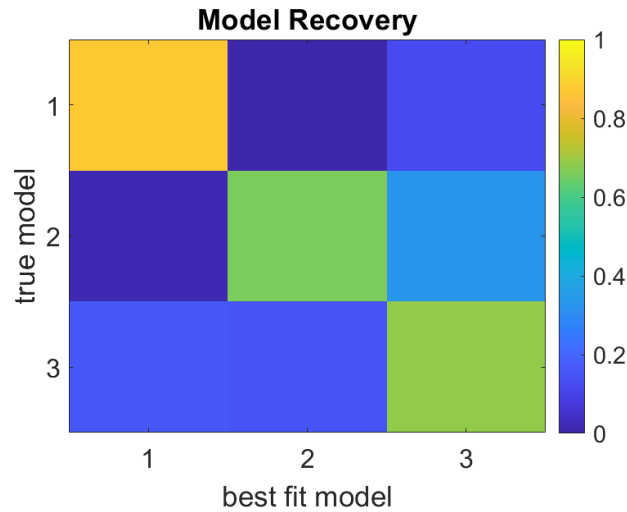

413

414 **Figure 5:** *Model recovery analysis. Each cell in the “confusion matrix” summarizes the*  
415 *percentage of simulated participants (under each true model) for which our model-fitting*  
416 *procedure attributed each of the (best fit) models. Note that our fitting procedure attributed the*  
417 *true model as the best fitting model for 87%, 66%, 69% of the time for Models 1-3, respectively.*  
418

### 419 ***Changes in attribute weights***

420 The results above show that the relative importance or weight of the pleasure and nutrition  
421 attributes change between the overall value rating and choice tasks even though, in theory, the  
422 same valuation processes should be employed in both cases. Other attribute weights may change  
423 as well, but we focus on pleasure and nutrition because we have the most data on those two  
424 attributes. Participants in these studies typically chose the more pleasurable of the two food options  
425 in the choice task. Therefore, we used hierarchical Bayesian logistic regression analyses to  
426 determine if pleasure weights reliably increased relative to nutrition weights across participants,  
427 or if instead participants were equally likely to show either an increase or a decrease in the  
428 weighting of pleasure relative to nutrition. We determined implied choices from the overall value  
429 ratings, classifying the food item with the higher rating as the chosen option. Pooling the data  
430 across all six experiments, we found that in choices compared to ratings, there was a consistent  
431 increase in the influence of pleasure (mean change in logistic regression coefficient = 0.57, 95%



432 highest density interval (HDI) = [-0.15, 1.31]) and a consistent decrease in the influence of  
433 nutrition (mean change in logistic regression coefficient = -0.25, 95% HDI = [-0.64, 0.14]). The  
434 mean difference in differences (i.e., interaction) between pleasure and nutrition weights across  
435 choice and rating sessions was 0.82 (95% HDI = [-0.10, 1.70]), and the posterior probability of  
436 this change being greater than zero was 0.96. Thus, on average, participants' choices were more  
437 influenced by pleasure than nutrition, relative to their overall value ratings. The difference in the  
438 influence of the attributes between the different valuation tasks is one reason why the DDMs using  
439 attribute-level information explain choices better than the DDM based on overall value ratings  
440 alone.

441

#### 442 *Choice Confidence*

443 The datasets we examined (and many others in the literature) show clear and robust  
444 relationships between the differences in the overall value ratings of options within each pair and  
445 choice consistency, RT, and confidence. We also found the expected negative relationship between  
446 RT and confidence in our data sets (cross-participant mean correlation = -0.35, s.e.m. = 0.01). The  
447 DDM analyses demonstrated that models including separate ratings of individual attributes explain  
448 choice consistency and RT better than models based on an aggregated overall value ratings alone.  
449 Standard DDM formulations do not directly predict choice confidence. However, any valid model  
450 of choice confidence should be able to account for the robust empirical finding that value  
451 difference has a positive impact on confidence. It would be interesting to know whether the  
452 differences in individual attribute ratings also have such an impact on confidence. To that end, we  
453 tested whether the overall value ratings or the independent ratings for each attribute, or their  
454 combination (i.e., the independent variable inputs to the three DDM variants we examined) better

455 explained the reported levels of choice confidence. We used a right-censored linear regression to  
456 fit the confidence data in all cases, because the participants' confidence ratings were clearly  
457 bounded by the upper limit of the reporting scale. In line with our DDM results on RTs and choice  
458 outcomes, the regression model for confidence based on both overall value and individual  
459 attributes was best (Table 1).

460

Table 1. Model comparison of linear regressions for confidence ratings

|       | Overall value  | Pleasure + Nutrition | Pleasure + Nutrition + Overall value |
|-------|----------------|----------------------|--------------------------------------|
| LOOIC | 2066.2 ± 190.2 | 2750.8 ± 192.6       | 1675.4 ± 192.9                       |

This table reports the mean ± SD of the LOO information criteria computed using Pareto smoothed importance sampling (Vehtari et al., 2017) for the three linear regressions we compared. Lower LOOIC values indicate better expected out-of-sample predictions.

461

462

## Discussion

463 The construction of a choice option's subjective value is an active, malleable process. We  
464 have shown that when options are composed of multiple distinct attributes, the manner in which  
465 these attributes are evaluated and potentially combined to determine the overall value of each  
466 option relative to the other depends on the valuation context. Specifically, the contributions of  
467 inherent attributes such as pleasure and nutrition to the overall value of food rewards differs when  
468 the foods are evaluated in isolation compared to when choices are made between pairs of foods,  
469 even though the goal of the valuation process should be the same in both cases. These findings  
470 indicate that preferences over naturalistic multi-attribute goods are sensitive to the details of the  
471 methods used to elicit them.

472 Most options that humans need to evaluate and choose from in daily life have multiple  
473 attributes or dimensions, and we found that these attributes are combined in a context-dependent  
474 manner to determine an option's value. Previous work on naturalistic multi-attribute decisions has  
475 shown that people form option representations based on a large number of separate underlying

476 attributes (Bhatia & Stewart, 2018). Our results on both choice outcomes and post-decision  
477 confidence ratings are consistent with these findings. In addition, our model simulation and  
478 comparison results show that the representations that determine an option's subjective value differ  
479 between rating and binary choice tasks. From the simulation tests, it is clear that decision models  
480 based on a unitary overall value do not generate the influence of disparity (Lee & Holyoak, 2021)  
481 on choices or response times seen in the empirical data. In terms of quantitative model  
482 comparisons, if the overall values of the foods in these six studies were invariant across the ratings  
483 and choice tasks, then DDMs using only the overall values to determine the drift rate (Model 1)  
484 would be preferred over DDMs using either a subset of the food attributes (i.e., Model 2 with  
485 pleasure and nutrition) or individual attributes plus the overall values (Model 3). This is because  
486 relative to Model 1, Model 2 adds complexity (one additional parameter) while at the same time  
487 reducing the completeness of the information about the food items – assuming overall value is  
488 determined by more than just pleasure and nutrition. Instead, the model comparisons showed a tie  
489 between Models 1 and 2 in our primary data sets. However, we also report preliminary evidence  
490 from a dataset with ratings of four separate attributes that multi-attribute DDM specifications such  
491 as Model 2 do far better when they include ratings for more than two individual attributes.  
492 Moreover, if overall value representations were constant, then Model 3 would add redundant  
493 complexity compared to Model 1 and be penalized for that complexity without benefiting from  
494 greater explanatory power in the comparisons. In fact, Model 3 (overall value + pleasure +  
495 nutrition) is the best in terms of generating the observed effects of attribute disparity and  
496 accounting for the pattern of choice outcomes and response times.

497         The superior ability of DDM and regression models including attribute-level information  
498 to explain the effects of disparity on choices and RTs, as well as in explaining choice confidence,

499 indicates that the importance of one or more attributes reliably differs during binary choices  
500 relative to ratings. Specifications of the DDM that use reports of overall value as the input to the  
501 evidence accumulation process implicitly hold the relative importance of each attribute fixed, and  
502 thus cannot account for differences in value computation between ratings of single options and  
503 choices over two or more options. In contrast, a multi-attribute DDM specification will directly  
504 estimate the importance weights for each attribute within the choice context and is therefore better  
505 able to explain choice behavior. However, these models are agnostic about how or why the  
506 importance of specific attributes differs when individuals are computing the overall value of a  
507 single option compared to choosing between two options.

508         Many sequential sampling models of decision making posit that attention and salience play  
509 an important role in value computation and comparison. Examples of such models are Decision  
510 Field Theory (DFT; Townsend & Busemeyer, 1993), an extension of DFT known as the Multi-  
511 Attribute Dynamic Decision (MADD) model (Diederich, 1997), and the attentional DDM (aDDM;  
512 Smith & Krajbich, 2019; Krajbich, Armel, & Rangel, 2010). In the DFT model, the drift rate can  
513 vary across deliberation time if, for example, one option is more salient but the other is truly more  
514 valuable. The MADD model makes the multi-attribute nature explicit, and the drift rate fluctuates  
515 over time as the decision maker shifts focus across the set of relevant attributes. Although the  
516 aDDM has generally been applied to the overall values of options, or to distinct items within a  
517 bundle (Fisher, 2017, 2021), it would be conceptually similar to the MADD if applied at the  
518 attribute level for goods that are inherently multidimensional. This also has some similarities with  
519 query theory, which holds that the order in which a decision maker considers different aspects (or  
520 attributes) of an option alters its resultant valuation (E. Johnson et al., 2007; Weber et al., 2007).  
521 In all these models, it is assumed that options or attributes that receive more attention will be

522 favored during the value comparison process. However, the relationship between value and  
523 attention is most likely bidirectional (Anderson et al., 2011; Callaway et al., 2021; Gluth et al.,  
524 2018; Jang et al., 2021; Towal et al., 2013).

525 Differences in the amount of attention directed to specific attributes during the evaluation  
526 and decision contexts could explain changes in the relative importance of the attributes across  
527 those contexts. Consistent with this idea, changes in the proportions of visual fixations to locations  
528 on a computer screen indicating the monetary amount versus the probability of winning when  
529 pricing versus choosing between lotteries are associated with inconsistencies between the two  
530 preference elicitation contexts (Alos-Ferrer et al., 2021; Kim et al., 2012). Fixation patterns  
531 towards monetary amount versus delay affect temporal discounting rates (Fisher, 2021a), although  
532 it has not yet been tested whether this might vary in pricing versus choice contexts. Internal  
533 attention processes may have effects similar to visual attention for naturalistic multi-attribute  
534 goods. The focus of internal attention is more difficult to measure than visual attention (i.e.,  
535 fixation locations), but studies combining decision tasks with neuroimaging or electrophysiology  
536 and machine learning techniques may give us a window into these cognitive processes (Aoi et al.,  
537 2020; Peixoto et al., 2021). Experimental manipulation of focus on a specific attribute (Fisher,  
538 2018; Hare et al., 2011) may also prove useful, if an appropriate method to dynamically shift  
539 attention within each trial is developed.

540 There may be other unknown mechanisms beyond differences in attention allocation that  
541 led to changes in the importance weights given to attributes during rating compared to choice tasks.  
542 Although both the rating and choice processes are noisy to some extent, noise is an unlikely  
543 explanation of our results. Unbiased noise in the two tasks could not account for the consistent  
544 increases in the weight on pleasure relative to nutrition during the choice versus rating tasks.

545 However, it is possible that changes in motivation, engagement, or perceptions of the food items  
546 and/or task goals may have differed in the overall value rating compared to binary choice sessions  
547 instead of or in addition to any change in attribute-level attention. The current data do not allow  
548 us to examine these alternative mechanisms in detail, and it will be important to address them in  
549 future studies.

550 In addition to providing further insight into the mechanistic nature of value-based  
551 decisions, our current work has practical implications for future studies of decision-making. We  
552 have shown that it is best to use as much attribute-level information as possible when modeling  
553 decisions over multi-attribute stimuli. Most, if not all, naturalistic stimuli are composed of multiple  
554 attributes, thus most studies of decision-making should incorporate attribute-level information. At  
555 the same time, it will often be impractical to collect information on a large number of attributes,  
556 especially if one needs subjective opinions about the attributes from each participant in an  
557 experiment. Our results indicate that combining attribute-specific and overall values may be a good  
558 compromise between attempting to include comprehensive attribute-level information and  
559 conforming to practical constraints. Naturally, which attribute-level information to obtain and how  
560 to best combine it with some type of overall value rating will depend on the hypotheses and  
561 experimental design. Given the clear evidence that the value-comparison process is based on  
562 context-dependent attribute weights, experiments that use a well-designed combination of  
563 attribute-specific and aggregate-level information should prove to be the most useful in advancing  
564 our understanding of many important decision mechanisms.

565

## References

566

567 Alós-Ferrer, C. (2018). A Dual-Process Diffusion Model. *Journal of Behavioral Decision Making*,  
568 31(2), 203–218. <https://doi.org/10.1002/bdm.1960>

569 Alos-Ferrer, C., Buckenmaier, J., & Garagnani, M. (2020). Stochastic Choice and Preference  
570 Reversals. *SSRN Electronic Journal*. <https://doi.org/10.2139/ssrn.3748599>

571 Alós-Ferrer, C., Granić, Đ.-G., Kern, J., & Wagner, A. K. (2016). Preference reversals: Time and  
572 again. *Journal of Risk and Uncertainty*, 52(1), 65–97. [https://doi.org/10.1007/s11166-016-9233-](https://doi.org/10.1007/s11166-016-9233-573)  
573 z

574 Alos-Ferrer, C., Jaudas, A., & Ritschel, A. (2021). Attentional Shifts and Preference Reversals: An  
575 Eye-Tracking Study. *Judgment and Decision Making*, 16(1), 57–93. [https://doi.org/10.5167/uzh-](https://doi.org/10.5167/uzh-576)  
576 198757

577 Anderson, B. A., Laurent, P. A., & Yantis, S. (2011). Value-Driven Attentional Capture.  
578 *Proceedings of the National Academy of Sciences*, 108(25), 10367–10371.  
579 <https://doi.org/10.1073/pnas.1104047108>

580 Aoi, M. C., Mante, V., & Pillow, J. W. (2020). Prefrontal cortex exhibits multidimensional dynamic  
581 encoding during decision-making. *Nature Neuroscience*, 23(11), 1410–1420.  
582 <https://doi.org/10.1038/s41593-020-0696-5>

583 Bettman, J. R., Luce, M. F., & Payne, J. W. (1998). Constructive Consumer Choice Processes.  
584 *Journal of Consumer Research*, 25(3), 187–217. <https://doi.org/10.1086/209535>

585 Bhatia, S., & Stewart, N. (2018). Naturalistic Multiattribute Choice. *Cognition*, 179, 71–88.  
586 <https://doi.org/10.1016/j.cognition.2018.05.025>

587 Bürkner, P.-C. (2017a). brms: An R Package for Bayesian Multilevel Models Using Stan. *Journal of*  
588 *Statistical Software*, 80(1), 1–28. <https://doi.org/10.18637/jss.v080.i01>

589 Bürkner, P.-C. (2017b). Advanced Bayesian Multilevel Modeling with the R Package brms.  
590 *ArXiv:1705.11123 [Stat]*. <http://arxiv.org/abs/1705.11123>

591 Busemeyer, J. R., & Townsend, J. T. (1993). Decision field theory: A dynamic-cognitive approach  
592 to decision making in an uncertain environment. *Psychological Review*, 100(3), 432.  
593 <https://doi.org/10.1037/0033-295X.100.3.432>

594 Callaway, F., Rangel, A., & Griffiths, T. L. (2021). Fixation Patterns in Simple Choice Reflect  
595 Optimal Information Sampling. *PLOS Computational Biology*, 17(3), e1008863.  
596 <https://doi.org/10.1371/journal.pcbi.1008863>

597 Daunizeau, J., Adam, V., & Rigoux, L. (2014). VBA: A Probabilistic Treatment of Nonlinear Models  
598 for Neurobiological and Behavioural Data. *PLOS Computational Biology*, 10(1), e1003441.  
599 <https://doi.org/10.1371/journal.pcbi.1003441>

600 Dawes, R. M. (1979). The robust beauty of improper linear models in decision making. *American*  
601 *Psychologist*, 34(7), 571–582. <https://doi.org/10.1037/0003-066X.34.7.571>

- 602 Dawes, R. M., & Corrigan, B. (1974). Linear models in decision making. *Psychological Bulletin*,  
603 81(2), 95–106. <https://doi.org/10.1037/h0037613>
- 604 Diederich, A. (1997). Dynamic Stochastic Models for Decision Making under Time Constraints.  
605 *Journal of Mathematical Psychology*, 41(3), 260–274. <https://doi.org/10.1006/jmps.1997.1167>
- 606 Feltgen, Q., & Daunizeau, J. (2021). An Overcomplete Approach to Fitting Drift-Diffusion Decision  
607 Models to Trial-By-Trial Data. *Frontiers in Artificial Intelligence*, 0.  
608 <https://doi.org/10.3389/frai.2021.531316>
- 609 Fischer, G. W., Carmon, Z., Ariely, D., & Zauberman, G. (1999). Goal-Based Construction of  
610 Preferences: Task Goals and the Prominence Effect. *Management Science*, 45(8), 1057–1075.  
611 <https://doi.org/10.1287/mnsc.45.8.1057>
- 612 Fishburn, P. C. (1974). Exceptional Paper—Lexicographic Orders, Utilities and Decision Rules: A  
613 Survey. *Management Science*, 20(11), 1442–1471. <https://doi.org/10.1287/mnsc.20.11.1442>
- 614 Fisher, G. (2017). An Attentional Drift Diffusion Model over Binary-Attribute Choice. *Cognition*, 168,  
615 34–45. <https://doi.org/10.1016/j.cognition.2017.06.007>
- 616 Fisher, G. (2018). Nutrition labeling reduces valuations of food through multiple health and taste  
617 channels. *Appetite*, 120, 500–504. <https://doi.org/10.1016/j.appet.2017.09.013>
- 618 Fisher, G. (2021a). Intertemporal Choices Are Causally Influenced by Fluctuations in Visual  
619 Attention. *Management Science*. <https://doi.org/10.1287/mnsc.2020.3732>
- 620 Fisher, G. (2021b). A Multiattribute Attentional Drift Diffusion Model. *Organizational Behavior and*  
621 *Human Decision Processes*, 165, 167–182. <https://doi.org/10.1016/j.obhdp.2021.04.004>
- 622 Friston, K., Mattout, J., Trujillo-Barreto, N., Ashburner, J., & Penny, W. (2007). Variational free  
623 energy and the Laplace approximation. *NeuroImage*, 34(1), 220–234.  
624 <https://doi.org/10.1016/j.neuroimage.2006.08.035>
- 625 Gigerenzer, G., & Gaissmaier, W. (2011). Heuristic Decision Making. *Annual Review of*  
626 *Psychology*, 62(1), 451–482. <https://doi.org/10.1146/annurev-psych-120709-145346>
- 627 Gluth, S., Spektor, M. S., & Rieskamp, J. (2018). Value-Based Attentional Capture Affects Multi-  
628 Alternative Decision Making. *ELife*, 7, e39659. <https://doi.org/10.7554/eLife.39659>
- 629 Grether, D., & Plott, C. (1979). Economic Theory of Choice and the Preference Reversal Effect.  
630 *American Economic Review*, 69, 623–638.
- 631 Hare, T. A., Malmaud, J., & Rangel, A. (2011). Focusing Attention on the Health Aspects of Foods  
632 Changes Value Signals in vmPFC and Improves Dietary Choice. *Journal of Neuroscience*,  
633 31(30), 11077–11087. <https://doi.org/10.1523/JNEUROSCI.6383-10.2011>
- 634 Jang, A. I., Sharma, R., & Drugowitsch, J. (2021). Optimal Policy for Attention-Modulated Decisions  
635 Explains Human Fixation Behavior. *ELife*, 10, e63436. <https://doi.org/10.7554/eLife.63436>
- 636 Johnson, E., Häubl, G., & Keinan, A. (2007). Aspects of Endowment: A Query Theory of Value  
637 Construction. *Journal of Experimental Psychology: Learning, Memory, and Cognition*, 33, 461–  
638 474. <https://doi.org/10.1037/0278-7393.33.3.461>



- 639 Johnson, E. J., & Payne, J. W. (1985). Effort and Accuracy in Choice. *Management Science*, 31(4),  
640 395–414. <https://doi.org/10.1287/mnsc.31.4.395>
- 641 Keeney, R. L., Raiffa, H., L, K. R., & Meyer, R. F. (1993). *Decisions with Multiple Objectives:  
642 Preferences and Value Trade-Offs*. Cambridge University Press.
- 643 Kim, B., Seligman, D., & Kable, J. W. (2012). Preference Reversals in Decision Making Under Risk  
644 are Accompanied by Changes in Attention to Different Attributes. *Frontiers in Neuroscience*, 0.  
645 <https://doi.org/10.3389/fnins.2012.00109>
- 646 Krajbich, I., Armel, C., & Rangel, A. (2010). Visual Fixations and the Computation and Comparison  
647 of Value in Simple Choice. *Nature Neuroscience*, 13(10), 1292–1298.  
648 <https://doi.org/10.1038/nn.2635>
- 649 Lee, D. G., & Daunizeau, J. (2021). Trading mental effort for confidence in the metacognitive  
650 control of value-based decision-making. *ELife*, 10, e63282. <https://doi.org/10.7554/eLife.63282>
- 651 Lee, D. G., & Holyoak, K. J. (2021). Coherence Shifts in Attribute Evaluations. *Decision*, No  
652 Pagination Specified-No Pagination Specified. <https://doi.org/10.1037/dec0000151>
- 653 Lee, D. G., & Usher, M. (2021). Value Certainty in Drift-Diffusion Models of Preferential Choice.  
654 *BioRxiv*, 2020.08.22.262725. <https://doi.org/10.1101/2020.08.22.262725>
- 655 Levav, J., Heitmann, M., Herrmann, A., & Iyengar, S. S. (2010). Order in Product Customization  
656 Decisions: Evidence from Field Experiments. *Journal of Political Economy*, 118(2), 274–299.  
657 <https://doi.org/10.1086/652463>
- 658 Lichtenstein, S., & Slovic, P. (1971). Reversals of Preference between Bids and Choices in  
659 Gambling Decisions. *Journal of Experimental Psychology*, 89(1), 46–55.  
660 <https://doi.org/10.1037/h0031207>
- 661 Lopez-Persem, A., Domenech, P., & Pessiglione, M. (2016). How prior preferences determine  
662 decision-making frames and biases in the human brain. *ELife*, 5, e20317.  
663 <https://doi.org/10.7554/eLife.20317>
- 664 Payne, J. W., Bettman, J. R., & Johnson, E. J. (1988). Adaptive strategy selection in decision  
665 making. *Journal of Experimental Psychology: Learning, Memory and Cognition*, 14, 534–552.
- 666 Payne, J. W., Bettman, J. R., & Johnson, E. J. (1993). *The adaptive decision maker*. Cambridge  
667 University Press. <https://doi.org/10.1017/CBO9781139173933>
- 668 Peixoto, D., Verhein, J. R., Kiani, R., Kao, J. C., Nuyujukian, P., Chandrasekaran, C., Brown, J.,  
669 Fong, S., Ryu, S. I., Shenoy, K. V., & Newsome, W. T. (2021). Decoding and perturbing  
670 decision states in real time. *Nature*, 1–6. <https://doi.org/10.1038/s41586-020-03181-9>
- 671 Penny, W. D. (2012). Comparing Dynamic Causal Models using AIC, BIC and Free Energy.  
672 *NeuroImage*, 59(1), 319–330. <https://doi.org/10.1016/j.neuroimage.2011.07.039>
- 673 R Core Team. (2020). *R: A Language and Environment for Statistical Computing*. R Foundation for  
674 Statistical Computing. <https://www.R-project.org/>
- 675 Ratcliff, R. (1978). A theory of memory retrieval. *Psychol. Rev*, 85(2), 59–108.

- 676 Ratcliff, R., & McKoon, G. (2008). The Diffusion Decision Model: Theory and Data for Two-Choice  
677 Decision Tasks. *Neural Computation*, *20*(4), 873–922. <https://doi.org/10.1162/neco.2008.12-06->  
678 420
- 679 Ratcliff, R., & Rouder, J. N. (1998). Modeling Response Times for Two-Choice Decisions.  
680 *Psychological Science*, *9*(5), 347–356. <https://doi.org/10.1111/1467-9280.00067>
- 681 Rigoux, L., Stephan, K. E., Friston, K. J., & Daunizeau, J. (2014). Bayesian Model Selection for  
682 Group Studies—Revisited. *NeuroImage*, *84*, 971–985.  
683 <https://doi.org/10.1016/j.neuroimage.2013.08.065>
- 684 Roe, R. M., Busemeyer, J. R., & Townsend, J. T. (2001). Multialternative Decision Field Theory: A  
685 Dynamic Connectionist Model of Decision Making. *Psychological Review*, *108*(2), 370–392.  
686 <https://doi.org/10.1037/0033-295X.108.2.370>
- 687 Russo, J. E., & Doshier, B. A. (1983). Strategies for multiattribute binary choice. *Journal of*  
688 *Experimental Psychology: Learning, Memory, and Cognition*, *9*(4), 676–696.  
689 <https://doi.org/10.1037/0278-7393.9.4.676>
- 690 Russo, J. E., Medvec, V. H., & Meloy, M. G. (1996). The Distortion of Information during Decisions.  
691 *Organizational Behavior and Human Decision Processes*, *66*(1), 102–110.  
692 <https://doi.org/10.1006/obhd.1996.0041>
- 693 Seidl, C. (2002). Preference Reversal. *Journal of Economic Surveys*, *16*(5), 621–655.  
694 <https://doi.org/10.1111/1467-6419.00184>
- 695 Shah, A. K., & Oppenheimer, D. M. (2008). Heuristics made easy: An effort-reduction framework.  
696 *Psychological Bulletin*, *134*(2), 207–222. <https://doi.org/10.1037/0033-2909.134.2.207>
- 697 Stan Development Team. (2021). *Stan Modeling Language Users Guide and Reference Manual*,  
698 *Version 2.27.0*. <http://mc-stan.org/>
- 699 Stephan, K. E., Penny, W. D., Daunizeau, J., Moran, R. J., & Friston, K. J. (2009). Bayesian model  
700 selection for group studies. *NeuroImage*, *46*(4), 1004–1017.  
701 <https://doi.org/10.1016/j.neuroimage.2009.03.025>
- 702 Towal, R. B., Mormann, M., & Koch, C. (2013). Simultaneous Modeling of Visual Saliency and  
703 Value Computation Improves Predictions of Economic Choice. *Proceedings of the National*  
704 *Academy of Sciences*, *110*(40), E3858–E3867. <https://doi.org/10.1073/pnas.1304429110>
- 705 Tversky, A. (1972). Elimination by aspects: A theory of choice. *Psychological Review*, *79*(4), 281–  
706 299. <https://doi.org/10.1037/h0032955>
- 707 Tversky, A., Sattath, S., & Slovic, P. (1988). Contingent Weighting in Judgment and Choice.  
708 *Psychological Review*, *95*(3), 371–384. <https://doi.org/10.1037/0033-295X.95.3.371>
- 709 Tversky, A., Slovic, P., & Kahneman, D. (1990). The Causes of Preference Reversal. *The*  
710 *American Economic Review*, *80*(1), 204–217.
- 711 Vehtari, A., Gelman, A., & Gabry, J. (2017). Practical Bayesian Model Evaluation Using Leave-  
712 One-out Cross-Validation and WAIC. *Statistics and Computing*, *27*(5), 1413–1432.  
713 <https://doi.org/10.1007/s11222-016-9696-4>

714 Weber, E. U., & Johnson, E. J. (2009). Mindful Judgment and Decision Making. *Annual Review of*  
715 *Psychology*, 60(1), 53–85. <https://doi.org/10.1146/annurev.psych.60.110707.163633>

716 Weber, E. U., Johnson, E. J., Milch, K. F., Chang, H., Brodscholl, J. C., & Goldstein, D. G. (2007).  
717 Asymmetric Discounting in Intertemporal Choice: A Query-Theory Account. *Psychological*  
718 *Science*, 18(6), 516–523. <https://doi.org/10.1111/j.1467-9280.2007.01932.x>

719
